# Supplementary material for: Enhanced hydrogen storage properties of NaAlH4co-catalysed with niobium fluoride and single-walled carbon nanotubes
Source: Royal Society of Chemistry journal article supplement (doi:10.1039/c1ra00645b), 2011-12-23
Supplement: c1ra00645b.pdf [file c1ra00645b.pdf]

Supporting information:

Enhanced hydrogen storage properties of NaAlH<sub>4</sub> co-catalysed with  
niobium fluoride and single-walled carbon nanotubes

*Jianfeng Mao<sup>a\*</sup>, Zaiping Guo<sup>a,b\*</sup>, Huakun Liu<sup>a</sup>*

<sup>a</sup> Institute for Superconducting and Electronic Materials, University of Wollongong, NSW  
2522, Australia

<sup>b</sup> School of Mechanical, Materials & Mechatronics Engineering, University of Wollongong,  
NSW 2522, Australia

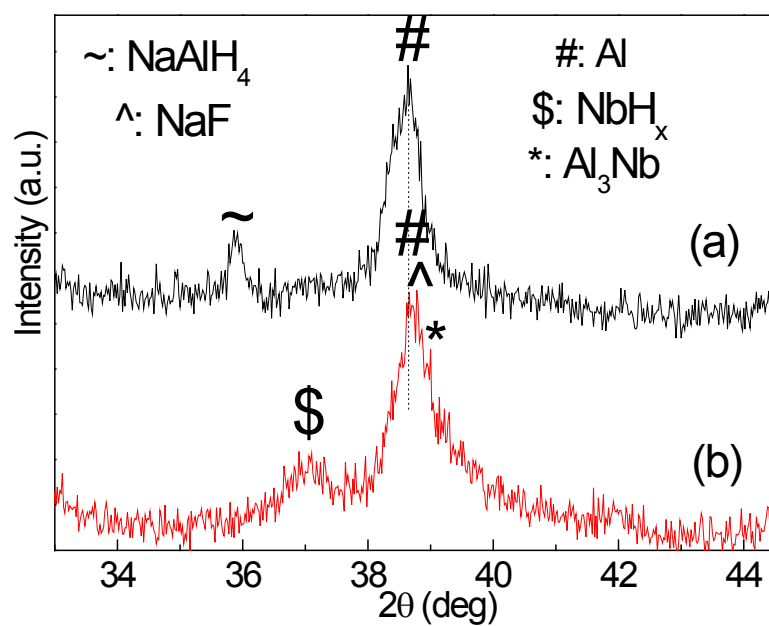

Figure S1. XRD patterns of the (a) NaAlH<sub>4</sub>-30 wt% NbF<sub>5</sub>-15 wt% SWCNT and (b) NaAlH<sub>4</sub>-60 wt% NbF<sub>5</sub>-30 wt% SWCNT samples after ball milling at 2θ of 33-44.5°.

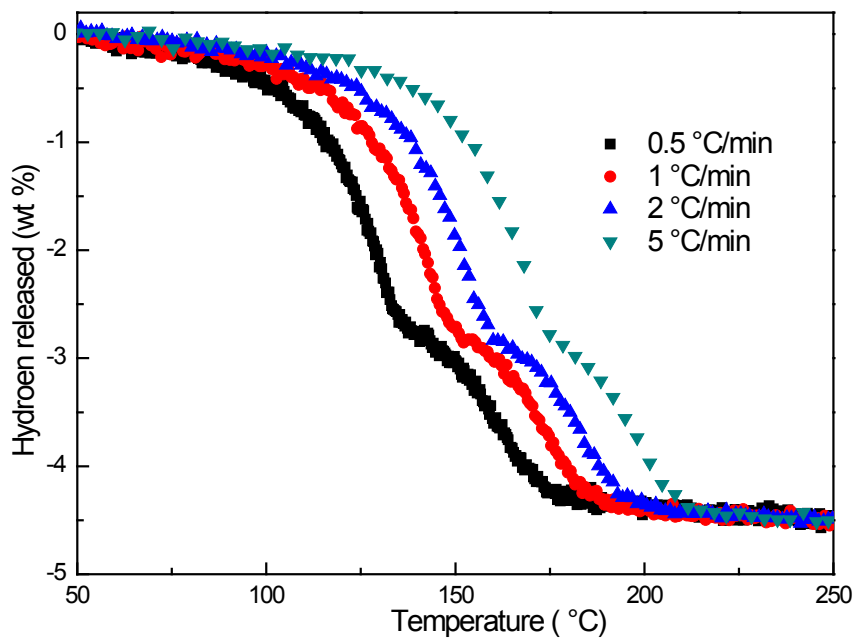

Figure S2. TPD curves of the NaAlH<sub>4</sub>-3 mol% NbF<sub>5</sub>-5 wt% SWCNT sample at various heating rate.

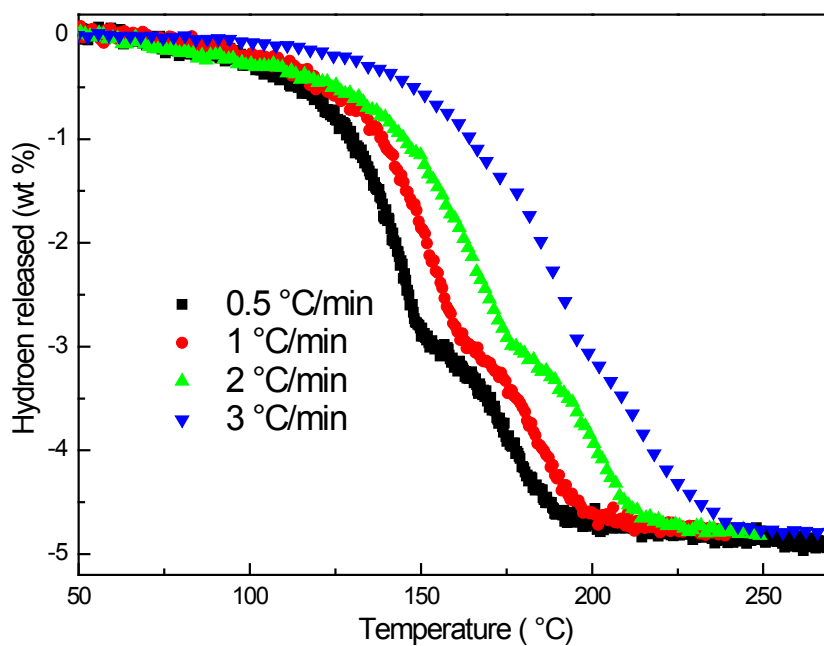

Figure S3. TPD curves of the NaAlH<sub>4</sub>-3 mol% NbF<sub>5</sub> sample at various heating rate.

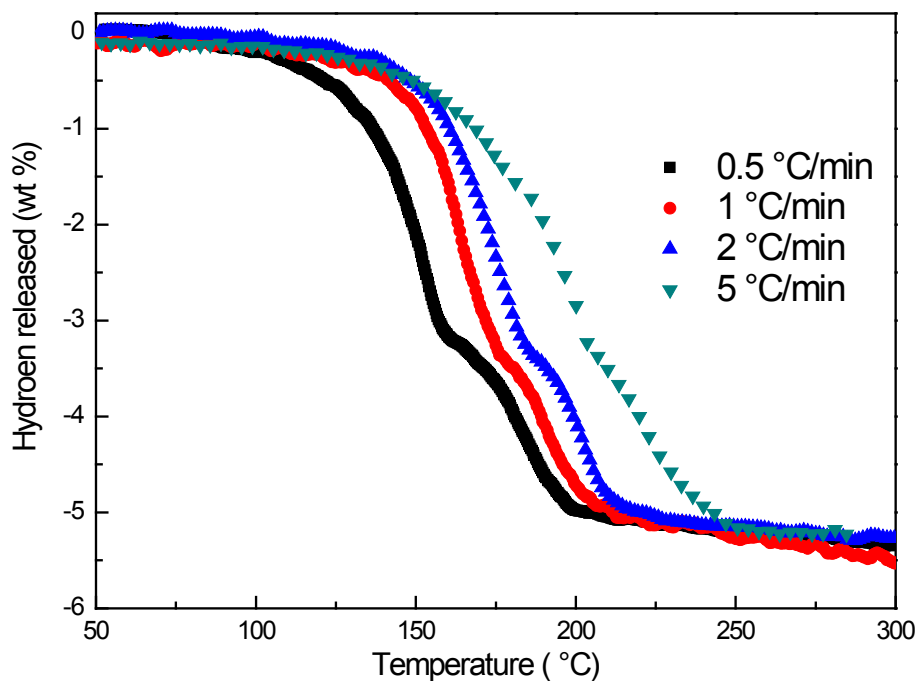

Figure S4. TPD curves of the NaAlH<sub>4</sub>-5 wt% SWCNT sample at various heating rate.
